# Supplementary material for: SUV420H1 enhances the phosphorylation and transcription of ERK1 in cancer cells
Source: PubMed Central journal article supplement (PMC4791223; doi:10.18632/oncotarget.6351), 2015-11-19
Supplement: oncotarget-06-43162-s001.pdf [file oncotarget-06-43162-s001.pdf]

## SUV420H1 enhances the phosphorylation and transcription of ERK1 in cancer cells

### Supplementary Materials

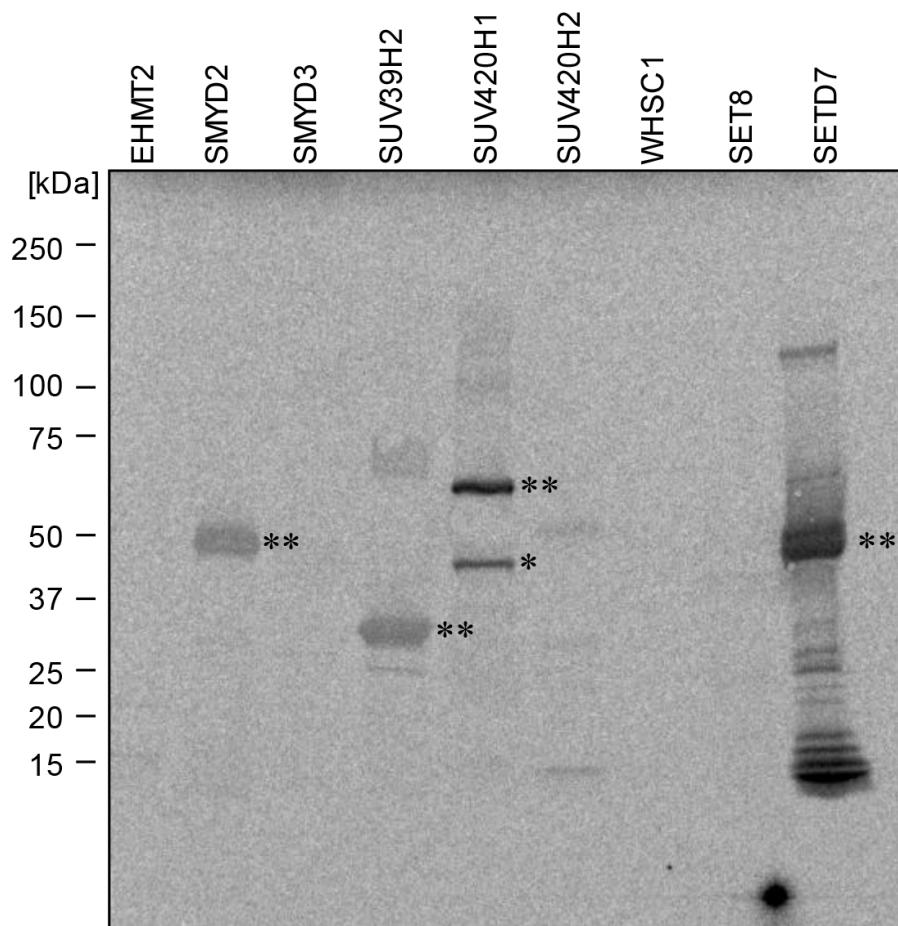

**Supplementary Figure S1: SUV420H1 methylates ERK1 *in vitro*.** Recombinant ERK1 protein was incubated with a variety of methyltransferases, and methylation signal was detected by autoradiography. \*ERK1 methylation band. \*\*automethylation band.

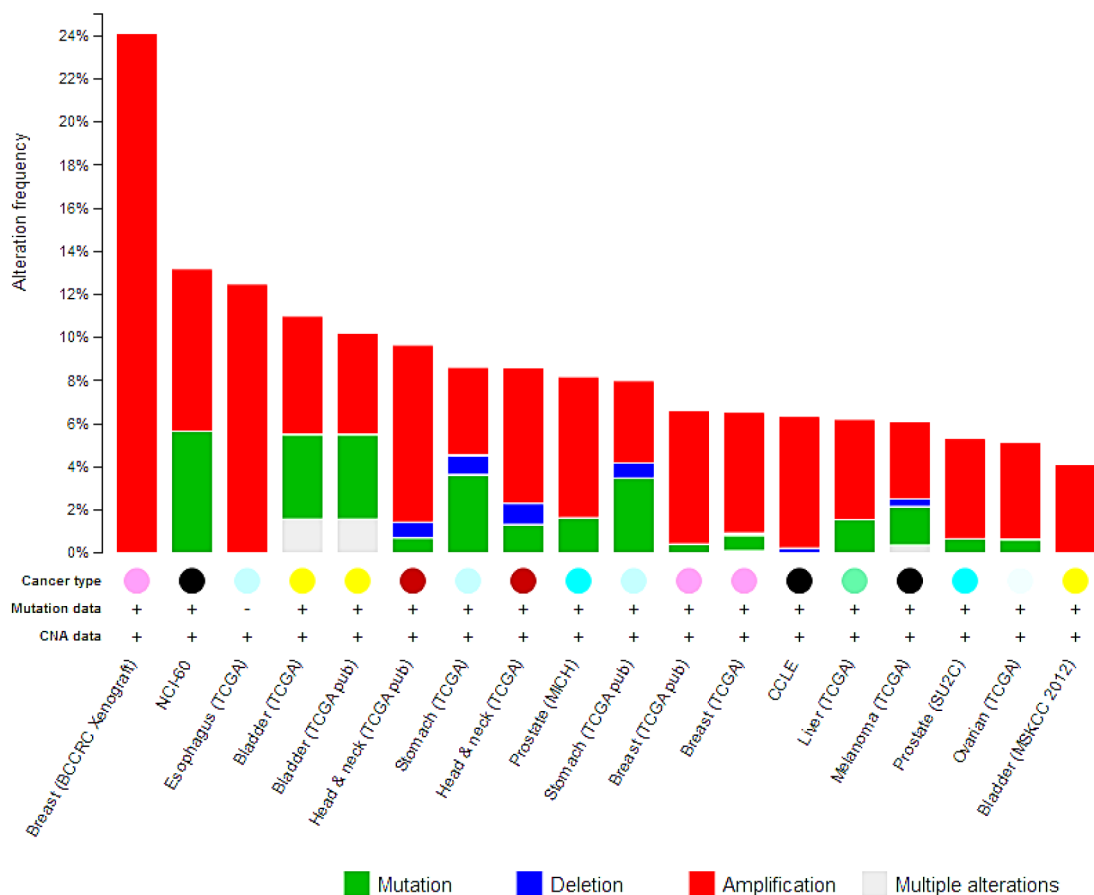

**Supplementary Figure S2: Cross-cancer alteration summary for *SUV420H1*.** The data were obtained from the TCGA database (<http://www.cbioportal.org/public-portal/>).

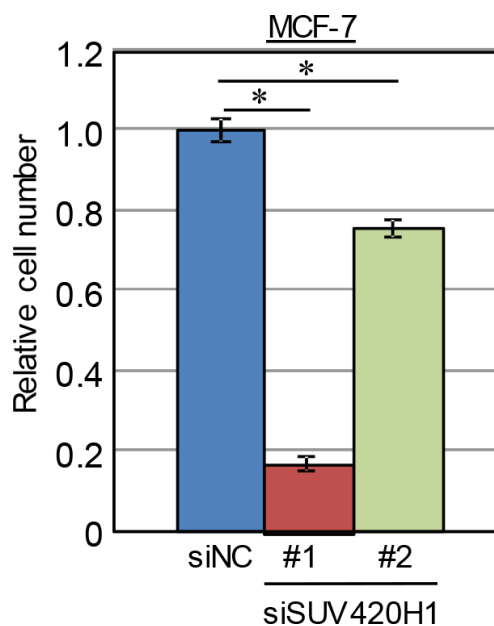

**Supplementary Figure S3: Involvement of *SUV420H1* in the growth of the breast cancer cell MCF-7.** Relative cell number shows the value normalized to siNC-treated cells. Mean  $\pm$  SD of four independent experiments. *P* values were calculated using Student's *t*-test ( $*P < 0.05$ ).

**Supplementary Table S1: Information of certificated cell lines**

| Name | Origin                            | Certification institution | Tested method | DNA profile or characteristics                                                                                                                                                                                                    |
|------|-----------------------------------|---------------------------|---------------|-----------------------------------------------------------------------------------------------------------------------------------------------------------------------------------------------------------------------------------|
| MCF7 | human breast cancer               | ATCC                      | STR           | Amelogenin: X/X CSF1PO: 10/10 D13S317: 11/11 D16S539: 11/12 D5S818: 12/12 D7S820: 8/9 THO1: 6/6 TPOX: 9/12 vWA: 14/15 D3S1358: 16/16 D21S11: 30/30 D18S51: 14/14 Penta E: 7/12 Penta D: 12/12 D8S1179: 10/14 FGA: 23/25 CLS 2011. |
| 293T | human embryonic kidney fibroblast | ATCC                      | STR           | Amelogenin: X CSF1PO: 11, 12 D13S317: 12, 14 D16S539: 9, 13 D5S818: 8, 9 D7S820: 11 THO1: 7, 9.3 TPOX: 11 vWA: 16, 18, 19                                                                                                         |
| HeLa | human cervix carcinoma            | ATCC                      | STR           | Amelogenin: X, Y CSF1PO: 11, 12 D13S317: 11, 14 D16S539: 9, 11 D5S818: 11, 12 D7S820: 10, 11 THO1: 8 TPOX: 8 vWA: 15                                                                                                              |

ATCC; American Type Culture Collection

**Supplementary Table S2: Characteristics of SCCHN cell lines**

| Cell name  | TNM stage | Specimen site | Gender | HPV status     |
|------------|-----------|---------------|--------|----------------|
| HN-SCC-151 | T3N0M0    | Oral tongue   | –      | HPV16-negative |
| FaDu       | –         | Hypopharynx   | Male   | HPV16-negative |

**Supplementary Table S3: Primer sequences for quantitative RT-PCR**

| Gene name                          | Primer sequence                |
|------------------------------------|--------------------------------|
| <i>GAPDH (housekeeping gene)-f</i> | 5' GCAAATTCATGGCACCGTC 3'      |
| <i>GAPDH (housekeeping gene)-r</i> | 5' TCGCCCCACTTGATTTTGG 3'      |
| <i>SDH (housekeeping gene)-f</i>   | 5' TGGGAACAAGAGGGCATCTG 3'     |
| <i>SDH (housekeeping gene)-r</i>   | 5' CCACCACTGCATCAAATTCATG 3'   |
| <i>SUV420H1-f</i>                  | 5' AGAAATCATTGCAAGCGGCTGGAG 3' |
| <i>SUV420H1-r</i>                  | 5' CTGGCTCCTATCTTTTTTAATGG 3'  |

**Supplementary Table S4: siRNA sequences**

| siRNA name         | Sequence                                     |
|--------------------|----------------------------------------------|
|                    | Target#1<br>Sense: 5' AUCCGCGCGAUAGUACGUA 3' |
| siNegative control | Antisense: 5' UACGUACUAUCGCGCGGAU 3'         |
| (Cocktail)         | Target#2<br>Sense: 5' UUACGCGUAGCGUAAUACG 3' |
|                    | Antisense: 5' CGUAUUACGCUACGCGUAA 3'         |
|                    | Target#3<br>Sense: 5' UAUUCGCGCGUAUAGCGGU 3' |
|                    | Antisense: 5' ACCGCUAUACGCGCGAAUA 3'         |
| siSUV420H1#1       | Sense: 5' CUGCGUUUAUAAACCAUGA 3'             |
|                    | Antisense: 5' UCAUGGUUUUAUAAACGCAG 3'        |
| siSUV420H1#2       | Sense: 5' GUGUCAACUGGUCGAGAU 3'              |
|                    | Antisense: 5' UAUCUCGACCAGUUGACAC 3'         |
